# Supplementary material
Source: MDPI journal article supplement (https://www.mdpi.com/2076-3417/11/1/419)
Supplement: s1 [file s1]

## Process analysis of the Thermochromic Paint

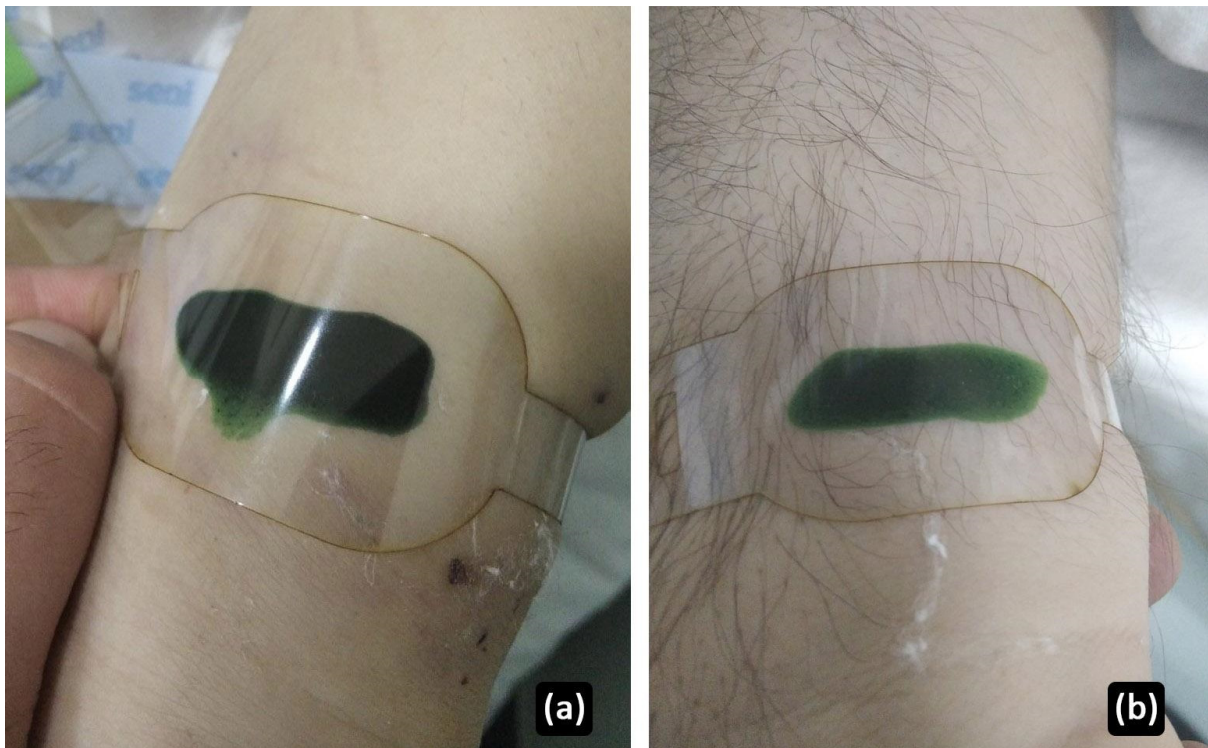

**Figure S1:** Process analysis of the thermochromic paint material **a)** body temperature 37.2 °C; **b)** body temperature 37.5 °C;

## Process analysis of the PLA Tri-Color Thermochromic Filament

| #1           | Model #1 Cube block |                  |
|--------------|---------------------|------------------|
|              | 30x30mm             |                  |
| Time (s)     | Temp #1 (37.2°C)    | Temp #2 (37.5°C) |
| Specimen 1.1 | 12                  | 12               |
| Specimen 1.2 | 30                  | 28               |
| Specimen 1.3 | 65                  | 62               |
| Specimen 1.4 | 115                 | 112              |
| Specimen 1.5 | 490                 | 480              |

**Table S1.** Results for measuring colour change for Model #1 (Cube block) with 3D printing tri-colour change filament in hospital conditions.

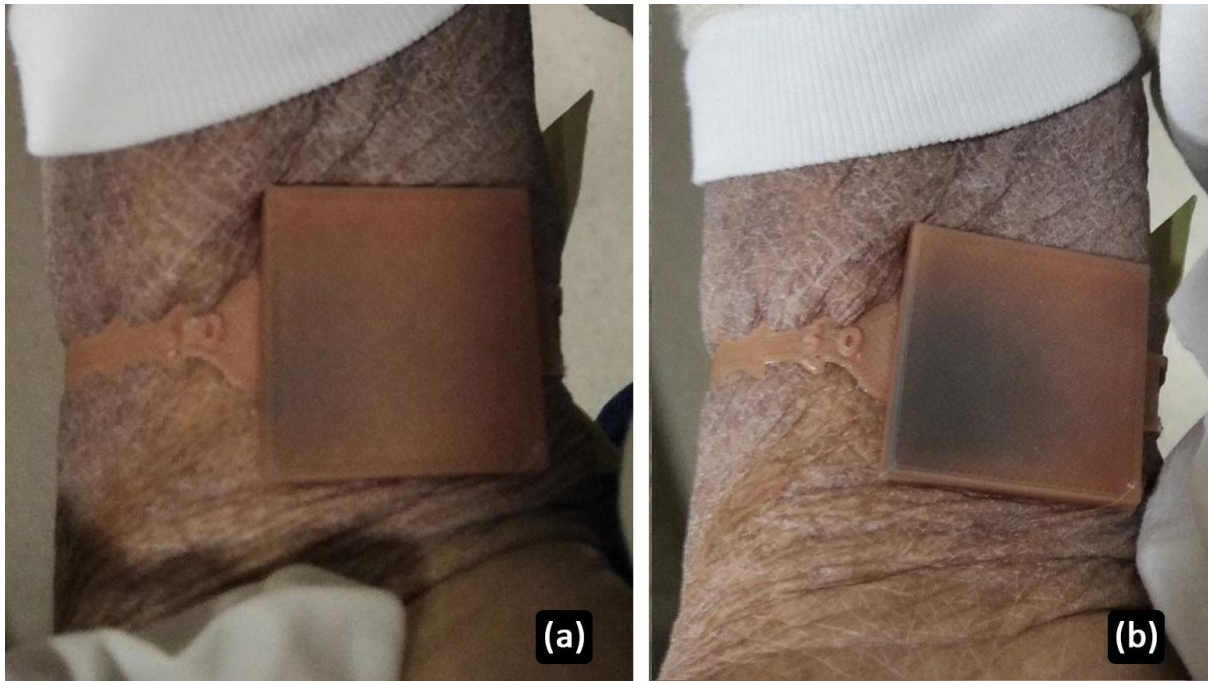

**Figure S2:** Process analysis of the PLA tri-colour change filament material for body temperature 37.5°C for Model #1 Cube block **a)** Specimen 1.1; **b)** Specimen 1.5;

| #2           | Model #2 Stepped pyramid |                  |
|--------------|--------------------------|------------------|
|              | 30x30mm                  |                  |
| Time (s)     | Temp #1 (37.2°C)         | Temp #2 (37.5°C) |
| Specimen 2.1 | 5                        | 5                |
| Specimen 2.2 | 27                       | 25               |
| Specimen 2.3 | 45                       | 45               |
| Specimen 2.4 | 63                       | 60               |
| Specimen 2.5 | 118                      | 115              |

**Table S2.** Results for measuring colour change for Model #2 (Stepped pyramid) with 3D printing tri-colour change filament in hospital conditions.

**#3**

**Model #3 Cube block with subtracted pyramid**

|              | 30x30mm          |                  |
|--------------|------------------|------------------|
| Time (s)     | Temp #1 (37.2°C) | Temp #2 (37.5°C) |
| Specimen 3.1 | 13               | 11               |
| Specimen 3.2 | 40               | 40               |
| Specimen 3.3 | 50               | 49               |
| Specimen 3.4 | 102              | 115              |
| Specimen 3.5 | 180              | 205              |

**Table S3.** Results for measuring colour change for Model #3 (Cube block with subtracted pyramid) with 3D printing tri-colour change filament in hospital conditions.

| #4           | Model #4 Pyramid with a subtracted pyramid |                  |
|--------------|--------------------------------------------|------------------|
|              | 30x30mm                                    |                  |
| Time (s)     | Temp #1 (37.2°C)                           | Temp #2 (37.5°C) |
| Specimen 4.1 | 10                                         | 9                |
| Specimen 4.2 | 26                                         | 23               |
| Specimen 4.3 | 37                                         | 34               |
| Specimen 4.4 | 55                                         | 52               |
| Specimen 4.5 | 84                                         | 81               |

**Table S4.** Results for measuring colour change for Model #4 (Pyramid with a subtracted pyramid) with 3D printing tri-colour change filament in hospital conditions.
